# Supplementary material
Source: PubMed Central journal article supplement (PMC4116616)
Supplement: NIHMS598829-supplement-01.pdf [file NIHMS598829-supplement-01.pdf]

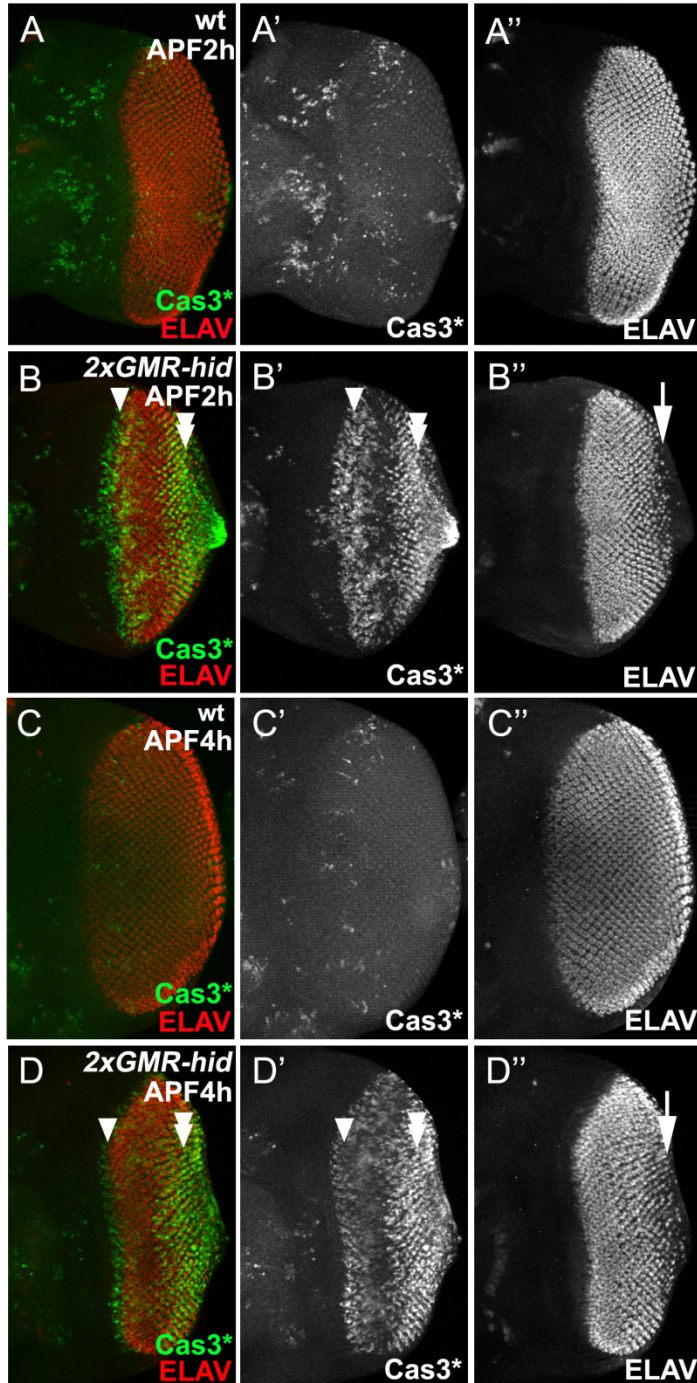

**Figure S1 (related to Figure 1). *GMR-hid*-induced cell death in pupal eye discs.**

(A, B) Early pupal eye discs (2 hours after puparium formation, APF2h) labeled with Cas3\* and ELAV. Compared to wild type (A) and larval *GMR-hid* eye discs (Figure 1), the second apoptotic wave gets wider in *GMR-hid* pupal discs (B). Accordingly, the density of photoreceptor neurons, especially at the posterior end, is reduced (arrow, B'').

(C, D) APF4h pupal eye discs labeled with Cas3\* and ELAV. Compared to wild type (A), the second apoptotic wave covers half of the *GMR-hid* eye disc (D). Density of photoreceptor neurons is further declining and the disc is now clearly reduced in size.

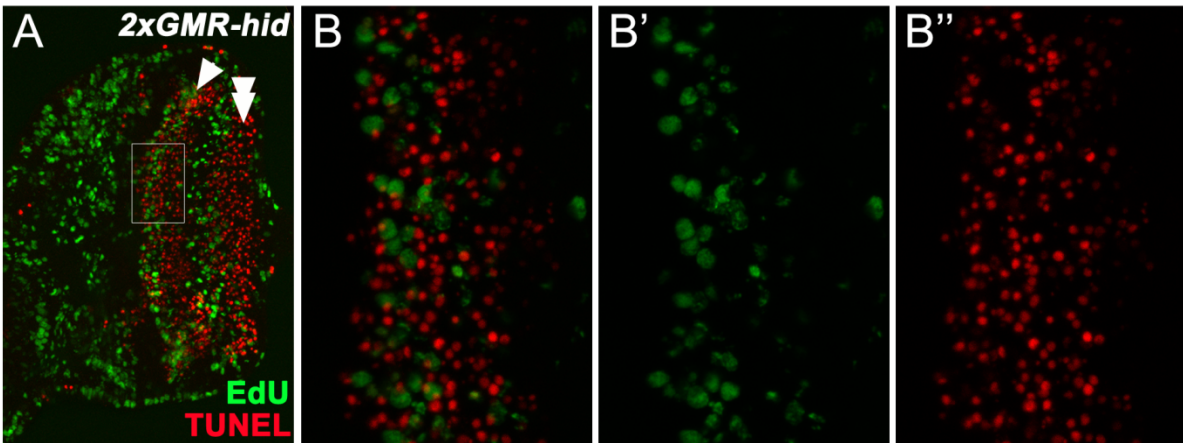

**Figure S2 (related to Figure 2). Proliferation and apoptosis markers are spatially very close in the first apoptotic wave in *GMR-hid* eye discs.**

(A) EdU (green) and TUNEL (red) double labeling of *2xGMR-hid* eye discs. Arrowhead and double arrowheads highlight the two apoptotic waves in *GMR-hid*. The wave of compensatory proliferation is visible in (A) between the two TUNEL-positive waves.

(B,B',B'') An image stack of 3 $\mu$ m shows an increased magnification view of the white box in (A). These markers do not overlap because apoptotic cells do not enter S phase.

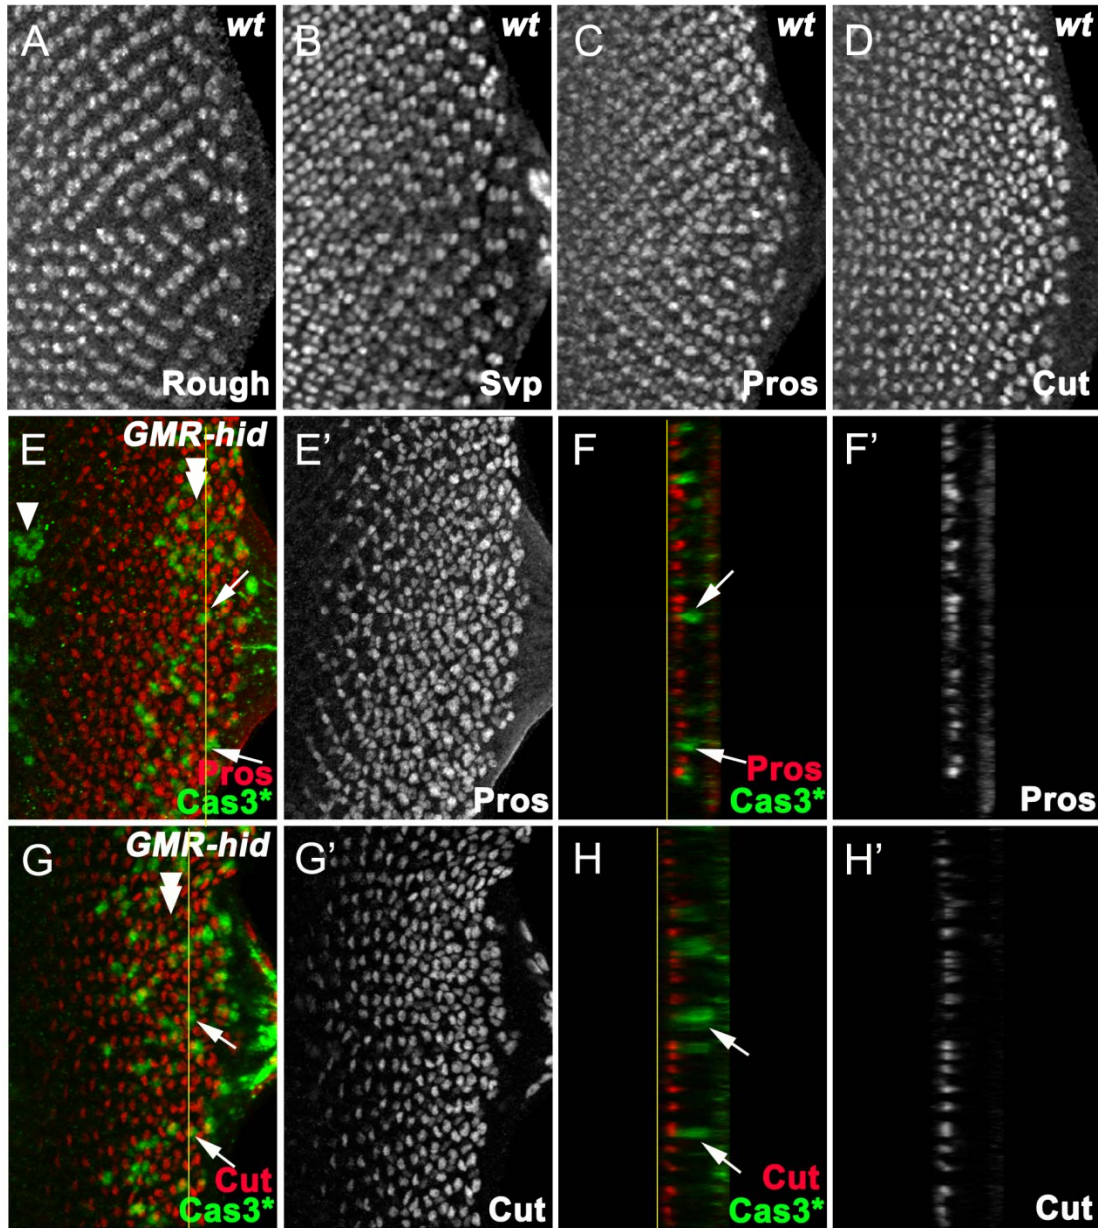

**Figure S3 (related to Figure 3). R7 and cone cells do not die in the second apoptotic wave.**

(A-D) Wild type late 3<sup>rd</sup> instar eye discs labeled with Rough (A), Svp (B), Prospero (Pros; labels R7 and its precursor cells) (C) or Cut (labels cone cells and their precursors) (D).

(E, F) Late 3<sup>rd</sup> instar *GMR-hid* eye discs labeled with Cas3\* and Pros. (F) shows a cross section of (E). The yellow line indicates location of the cross section in (E) and marks its apical surface in (F). Pros-positive cells are not labeled with Cas3\* (arrows) and they do not die in the second apoptotic wave.

(G, H) Late 3<sup>rd</sup> instar *GMR-hid* eye discs labeled with Cas3\* and Cut. (H) shows a cross section of (G). The yellow line indicates location of the cross section in (G) and its apical surface in (H). Cut-positive cells are not labeled with Cas3\* (arrows) and they do not die in the second apoptotic wave.

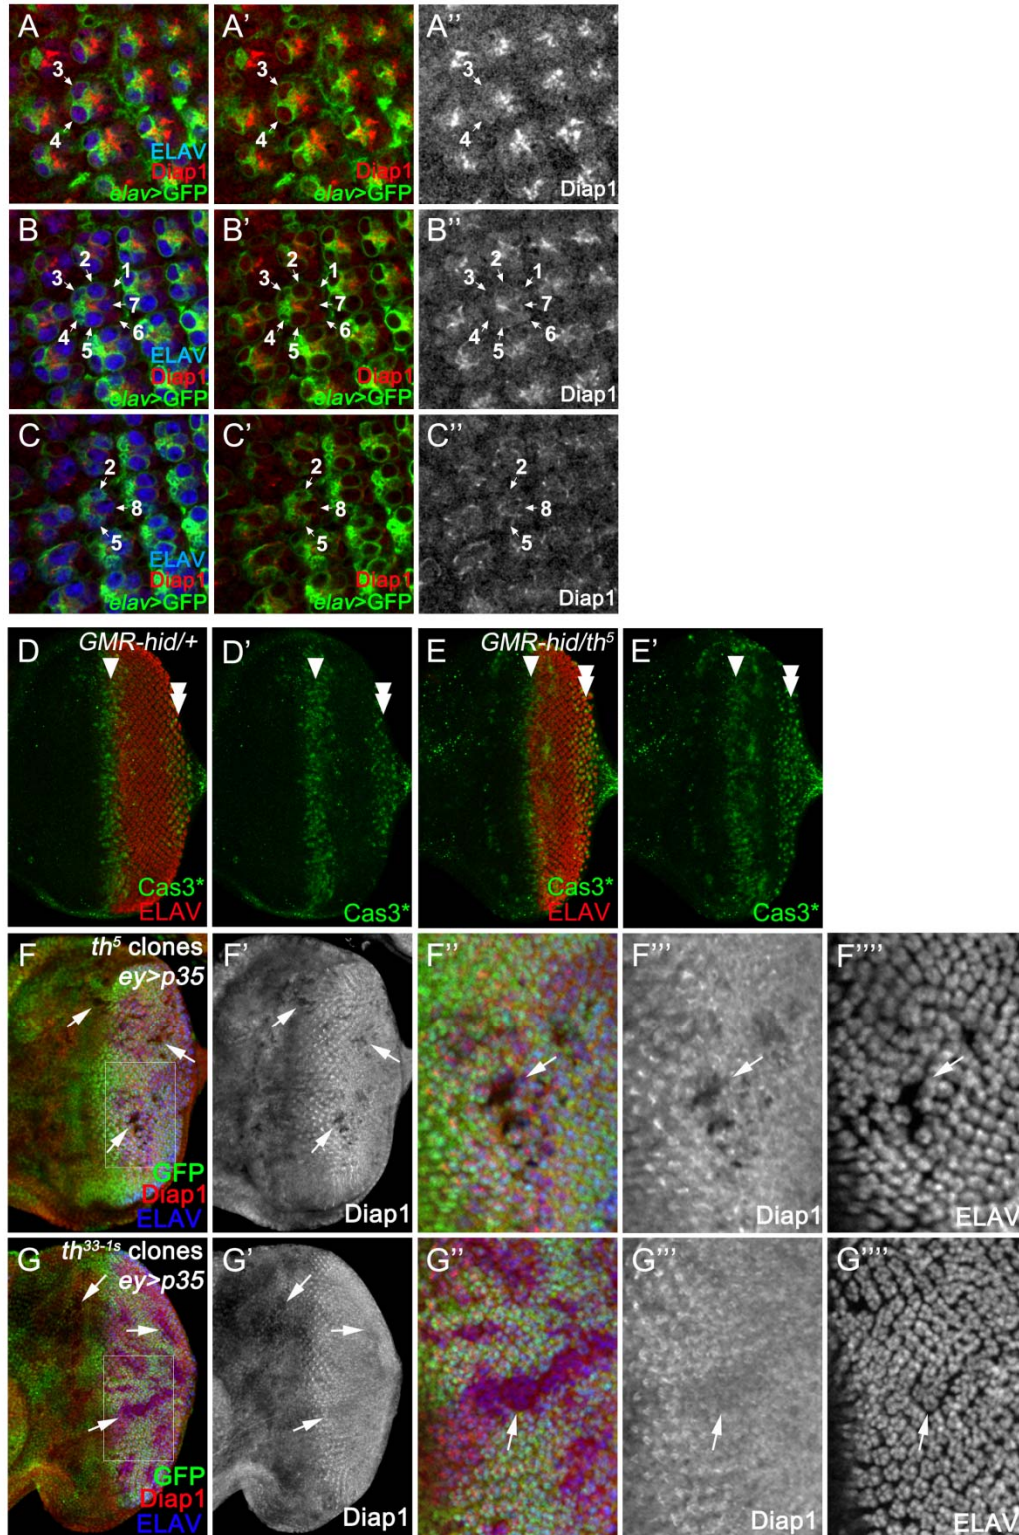

**Figure S4. Histochemical and mutant analysis of Diap1 in the developing larval retina (related to Figure 5).**

**(A-C'')** Diap1 accumulates in all photoreceptor neurons.

Shown are different high-resolution confocal sections of the same wild-type eye imaginal discs expressing *elav-Gal4*-driven membrane-bound GFP (*elav-Gal4 UAS-CD8GFP*). Photoreceptor neurons are indicated by numbers.

**(D-E).** Loss one copy of *diap1* enhances *GMR-hid*-induced apoptosis.

Late 3<sup>rd</sup> instar eye discs labeled by Cas3\* and ELAV. *th*<sup>5</sup> is a null allele of *diap1*. Compared to *GMR-hid* alone (**D,D'**), both first and second waves of apoptosis are broader in *GMR-hid/+;th*<sup>5</sup>/*+* eye discs (**E,E'**). Accordingly, the apoptosis free zone is reduced in (E,E').

**(F-G) Verification of Diap1 antibodies.**

Late 3<sup>rd</sup> instar eye discs labeled by Diap1 and ELAV. *diap1* null (*th*<sup>5</sup>) (**F**) or hypomorphic (*th*<sup>33-1s</sup>) (**G**) mutant clones are negatively labeled for GFP. *th*<sup>33-1s</sup> lacks the RING domain of Diap1, but leaves the BIR domains intact. *p35* was expressed in the eye (*ey>p35*) to block apoptosis in *diap1* mutant clones. (F'', G'') show enlarged views of the outlined regions in (F, G), respectively. Photoreceptor neurons do not form (ELAV-negative) in *th*<sup>5</sup> clones. Diap1 labeling is missing in *th*<sup>5</sup> clones (arrows in F-F''). In *th*<sup>33-1s</sup> clones, photoreceptor neurons do form. Although the RING domain is deleted in *th*<sup>33-1s</sup>, Diap1<sup>33-1s</sup> protein levels are not increased, but rather reduced compared to neighboring wild-type tissue (arrows in G-G'').

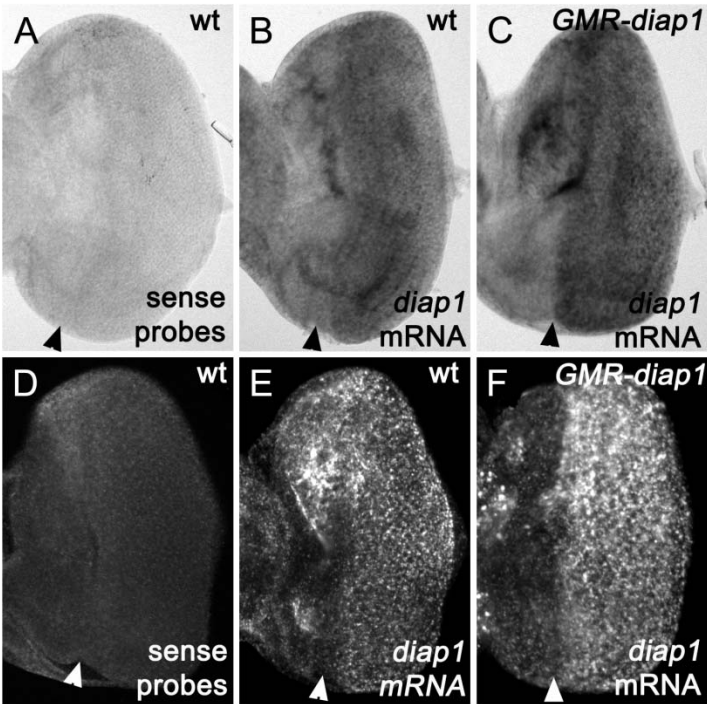

**Figure S5. *diap1* transcription is not increased in photoreceptor neurons (related to Figure 6).**

In situ hybridization of late 3<sup>rd</sup> instar eye discs with DIG-labeled probes detected with either NBT/BCIP (A-C) or Tyramide Signal Amplification (D-F). Compared to the control discs using sense probes (A, D), *diap1* is ubiquitously expressed in wild type eye discs (B, E). The *diap1* probe worked as it detects high levels of *diap1* in *GMR-diap1* discs posterior to the MF (C, F). Levels of *diap1* transcripts are not specifically increased in photoreceptor neurons.

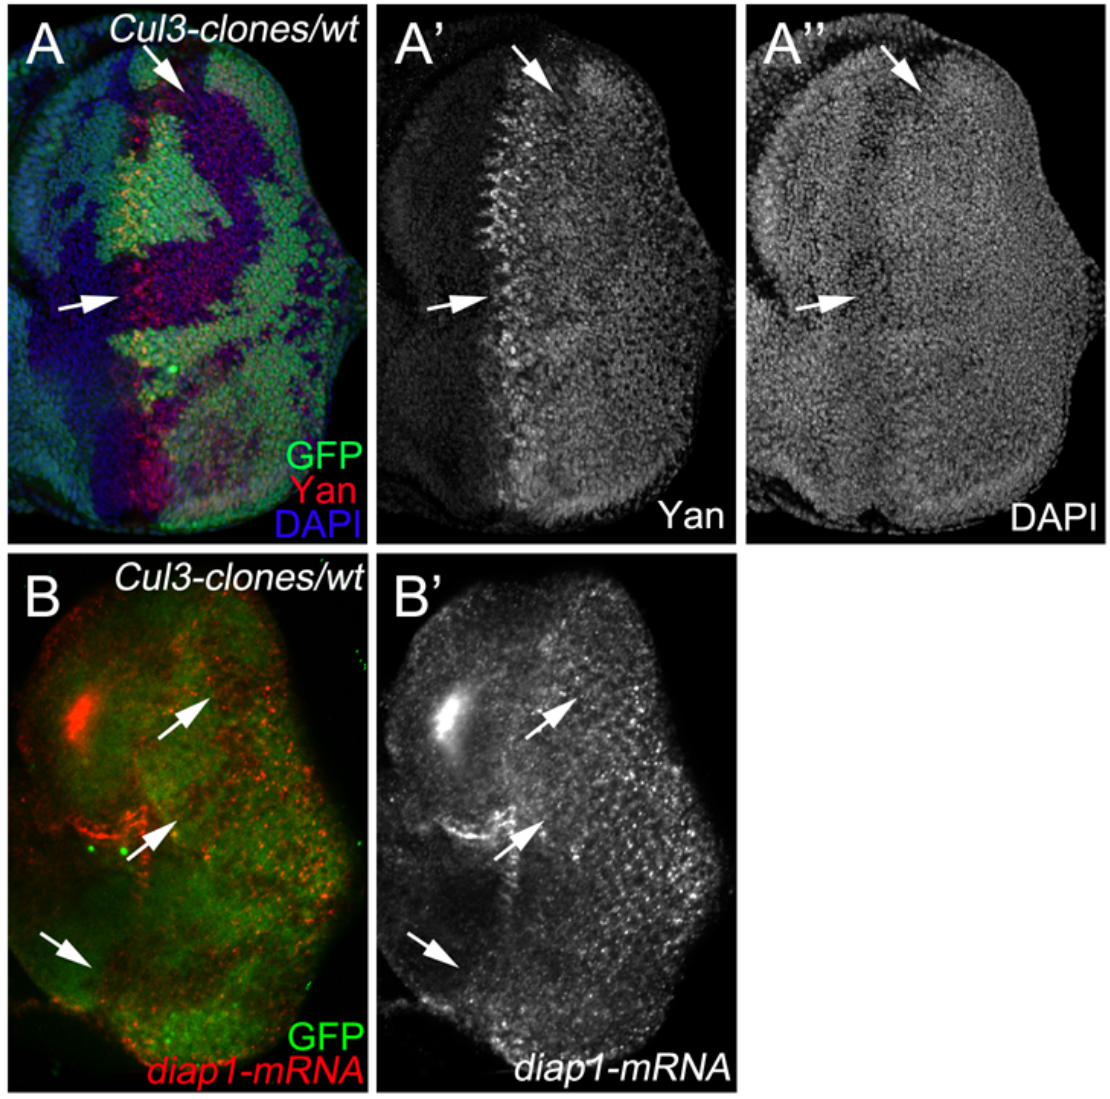

**Figure S6. Cell number does not increase in *Cul3* mutant clones (related to Figure 7).**

(A,B) Late 3<sup>rd</sup> instar eye disc labeled by (A) Yan (marker of unspecified cells) and (B) *diap1* in situ probe. DAPI as nuclear marker was added in (A). *Cul3* clones (arrows) are labeled by the lack of GFP. Numbers of unspecified cells (A') and total cells (A'') do not increase in *Cul3* clones. *diap1* mRNA is not increased in *Cul3* clones (B, B').
